# Supplementary material for: One pot biosynthesis of gold NPs using red cabbage extracts
Source: Royal Society of Chemistry journal article supplement (doi:10.1039/c2dt11839d), 2011-12-13

## SUPPLEMENTARY INFORMATION

UV-Vis spectroscopy spectra of pure red cabbage extract for different pH.

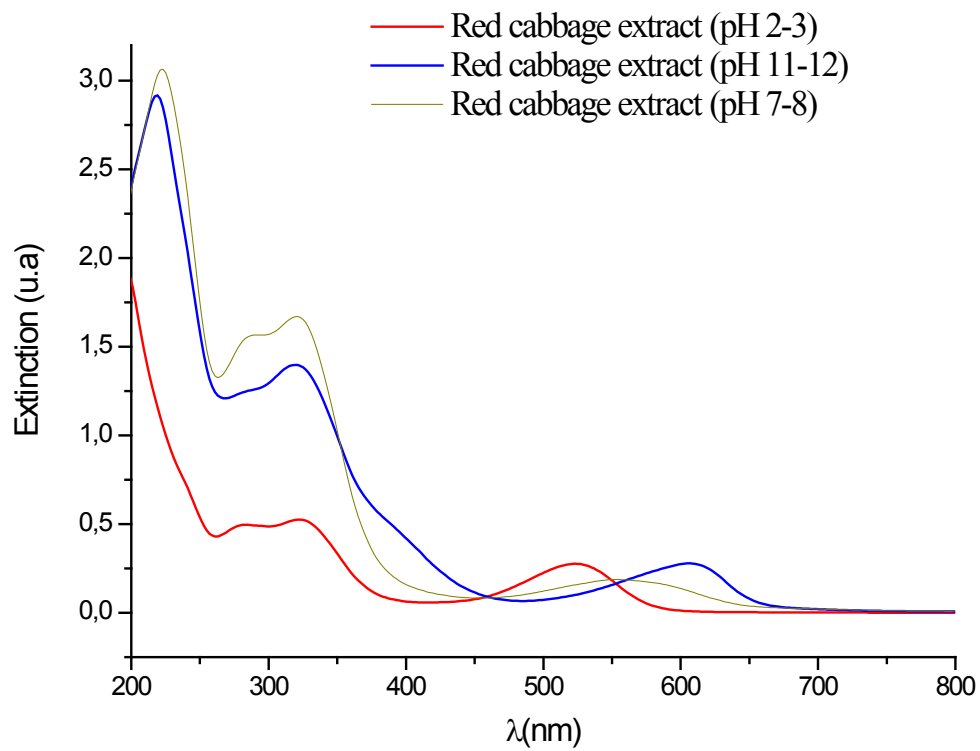

Supplement: c2dt11839d.pdf [file c2dt11839d.pdf]
